# Supplementary material
Source: MDPI journal article supplement (https://www.mdpi.com/1424-2818/14/10/804)
Supplement: s1 [file s1]

Archive with 5 entries (5 files):
- Captions for Supplementary files.pdf
- Hernandez - Table S1 Benthic community.xlsx
- Hernandez - Table S2. Coral recruit density.xlsx
- Hernandez - Table S3 Water quality.xlsx
- Supp 4 - Remotely sensed WQ data.pdf
