# Supplementary material
Source: MDPI journal article supplement (https://www.mdpi.com/1424-2818/14/10/804)
Supplement: s1 [file s1 › Captions for Supplementary files.pdf]

### Captions for Supplementary files

**Table S1.** Summary of coral reef benthic community percent composition data by region and location.

**Table S2.** Summary of coral recruit community density data ( $\#/m^2$ ) by region and location.

**Table S3.** Summary of *in situ* water quality parameters data by region and location.

**Table S4.** Annual values of remotely sensed water quality parameters (2017-2020) across study locations.

**Table S5.** Distance-based linear model analysis (DISTLM) of the impact of the normalized maximum annual values of remotely sensed water quality parameters (2017-2020) on coral recruit abundance.

**Figure S1.** Shade plot based on the  $\sqrt{}$ -density ( $\#/m^2$ ) of coral recruits by species  $\times$  region  $\times$  location. Refer to the Methodology for the description of acronyms.

**Figure S2.** Bubble plot based on a non-metric multidimensional scaling analysis (nMDS) on the  $\sqrt{}$ -density ( $\#/m^2$ ) of all coral recruits by region and by sampling location. Refer to the Methodology for the description of acronyms. Stress level= 0.01.

**Figure S3.** Bubble plot based on a non-metric multidimensional scale analysis (nMDS) on the species richness (S) of all recruits by region and by locality. Refer to the Methodology for the description of acronyms.

**Figure S4.** Running mean, maximum and minimum values of remotely sensed water quality parameters (2017-2020) across study locations: A) Sea surface temperature anomaly ( $^{\circ}C$ ); B) Light extinction coefficient  $\text{Log}_{10} K_{d490} \text{ m}^{-1}$ ; C) Chlorophyll-*a* concentration ( $\text{mg m}^{-3}$ ); D) Net primary productivity ( $\text{mg C m}^{-2} \text{ day}^{-1}$ ); E) Particulate organic carbon concentration ( $\text{mg m}^{-3}$ ); and F) Particulate organic carbon concentration ( $\text{Log}_{10} \text{ mol m}^{-3}$ ).

**Figure S5.** Distance-based redundant analysis (dbRDA) of the impact of the normalized maximum annual values of remotely sensed water quality parameters (2017-2020) on coral recruit abundance by region and location. This solution explains 97.96% of the observed fitted variation and 58.31% of the total variation. Refer to the Methodology for the description of acronyms.
