# Supplementary material
Source: MDPI journal article supplement (https://www.mdpi.com/1424-2818/14/10/804)
Supplement: s1 [file s1 › Hernandez - Table S1 Benthic community.xlsx]

## Sheet: Sheet1
Benthic community structure	PDM1	PDM2	PDM3	PDM4	PDM5	PDM6	PFI1	PFI2	PFI3	PFI4	PFI5	PFI6	CDP1	CDP2	CDP3	CDP4	CDP5	CDP6	CAC1	CAC2	CAC3	CAC4	CAC5	CAC6	BRI1	BRI2	BRI3	BRI4	BRI5	BRI6	TPA1	TPA2	TPA3	TPA4	TPA5	TPA6	PCR1	PCR2	PCR3	PCR4	PCR5	PCR6	BTA1	BTA2	BTA3	BTA4	BTA5	BTA6	TAR1
Scleractinian coral	0	0	0	0	0.3	0.2	0.5	1	2.5	1.8	2.9	4.2	13.7	17.5	25.4	20.8	10.6	25	1.5	0.8	1.9	4.7	4.1	2.5	15	13.5	10.8	12.3	8.6	11.1	14.2	17.5	9.2	20	16.7	23.3	18.6	20.7	22.3	14.5	17.2	16.7	6.2	5.3	3.4	5.4	8.2	6.6	1.2
Hydrocoral	0	0	0	0	0	0	1	0	0	0.2	0.1	1.6	5.3	3.7	1	0.4	5.9	6.3	0	0.8	0.7	0	0	0.3	10	3.4	4.2	6.7	10.8	0	0	1.7	0.8	0.8	0	0	2.2	0	0	0	0.2	0	3.2	2.2	0.6	0.1	0.2	2.6	1.8
Octocoral	0	0	0	0	0	0	1.2	2.1	2.4	0.6	0.2	0.3	1.8	0.6	0	4.6	3.3	8.7	0	0	0	0	0	0.1	2.1	4.7	5.2	3.3	0.8	0	6.8	1.7	1.7	3.3	10	3.3	0.1	0	1.8	3.3	4.4	5.1	1.8	0	0	0	0.1	0	0
Sponge	0	0	0	0.2	0	0	0	0.2	0	0	0.1	0	0	0.2	0	0.2	1.1	0	0	0	0	0	0.1	0	0.7	2	0.8	2.1	0	0	0	0	1.3	0	0	3.1	0	0	0	0	0	0.1	0.1	0.2	0	0.6	0.1	0	0.1
Palythoa caribbaeorum	0	0	0	0	0.2	0.2	0	0	5.8	0	0.2	0.2	2.2	0.9	0	0	0	0.2	0	0	0	1.6	0	0.7	10.8	6.2	3.6	0	1	1.6	23.3	24.2	10	17.5	13.3	7.5	0	0.1	0	0	0	0	2.2	0.9	4.7	0.1	0	0	0
Macroalgae	32	35.2	30.4	35.8	36.3	40.4	35.9	38	51.8	51.5	59.5	58.4	2.8	4.3	2.5	3.2	2.3	1.7	0	0	0.8	0	0	0.1	3.5	5.2	1.1	2.1	0.9	1.2	5.2	2.5	3.1	6.2	5.3	3	0	0	0.3	0.2	0	0	0	0.1	0.1	0	0	0	1
Dictyota sp.	6.2	2.2	5.2	1.6	3.9	2.8	22.3	18	5.2	11.8	17.2	13.5	6.2	2.2	5.2	1.6	3.9	2.8	4.7	6.1	4.2	3.1	5.7	3.6	1.3	0.1	0	0.7	2.1	2.5	14.7	23.6	49.8	22.6	26.3	33.8	13.4	17.2	23.5	24.7	18.9	2.8	3.1	0.1	0	1.2	0.8	0	3.1
Lobophora variegata	0	0	0	0	0	0	0	0	0	0	0	0	0	0	0	0	0	0.2	0	0	0	0	0	0	0	0	0	0	0	0	0	0	0	0	0	0	4.2	3	1.2	0	0	0.3	0	0	0	0	0	0	0
Ramicrusta textilis	2.4	1.2	0	0.6	0.8	0.2	2.4	1.2	0	0.6	0.8	0.2	4.5	3.1	0.2	0.6	2.5	1.4	0	0	0	0.6	0	0	1.6	0	0	0.1	1.6	0	5.3	6.9	3.6	4.9	7.2	3.5	0.3	2.7	0.1	0	0	4.2	0.5	0	0	0	0.2	0.1	1.1
Peyssonnellia Algal Crust (PAC)	0.4	0	0.2	1.2	0.6	0	0.4	0	0.2	1.2	0.6	0	6.2	5.8	9.2	7.5	21.1	7.2	0	0.8	0	1.1	0	0	4.3	2.8	3.5	6.2	5.1	6.9	7	2.8	4.9	8	9	8.3	48.6	47.1	42.5	50.2	50	61.5	0	0	0.2	0.1	1.1	0	0.2
CCA	0	0	0	0	0	0	0	0	0	0	0	0	27.2	30.1	26.6	20.7	16.8	10	0.1	0	0	0	0.3	0	4.8	4.6	2.3	6.1	8.2	6.2	5.3	4.3	2.1	1.1	1.6	2.8	0.6	1.2	1	0.8	3.1	0.2	58.8	62.8	66	60.2	65.7	62.5	15.7
Turf	53	59.2	59.8	50.4	54.1	48.3	30.3	37.3	27.7	22.1	14.6	13.7	22	26.4	25.8	31.5	23.3	28.6	79.6	75.3	80.2	70.5	67.7	74.6	41.1	53.7	63.3	59.5	58.6	68.3	13.5	12.6	10.1	14.2	8.7	8.6	8.8	5.6	6.2	6.3	5.4	8.5	16.6	21.1	20.6	27.2	19.6	24.7	72.1
Cyanobacteria	2	0.2	0	0	1.2	4.1	2	0.2	0	0	1.2	4.1	0.1	0	0.2	0	0	0.6	1.7	0	3.3	3.7	2.3	2.1	1.8	2.1	0.3	0	0	0.2	0	0	0.2	0.1	0	0	0	0.3	0	0	0.8	0.6	0	0.2	0.1	0	0	0	0
Open	4	2	4.4	10.2	2.6	3.8	4	2	4.4	10.2	2.6	3.8	8	5.2	3.9	8.9	9.2	7.3	12.4	16.2	8.9	14.7	19.8	16	3	1.7	4.9	0.9	2.3	2	4.7	2.2	3.2	1.3	1.9	2.8	3.2	2.1	1.1	0	0	0	6.5	7.1	4.3	5.1	4	3.5	3.7
Region	East	East	East	East	East	East	East	East	East	East	East	East	East	East	East	East	East	East	West	West	West	West	West	West	West	West	West	West	West	West	West	West	West	West	West	West	Cul	Cul	Cul	Cul	Cul	Cul	Cul	Cul	Cul	Cul	Cul	Cul	Cul
Location	PDM	PDM	PDM	PDM	PDM	PDM	PFI	PFI	PFI	PFI	PFI	PFI	CDP	CDP	CDP	CDP	CDP	CDP	CAC	CAC	CAC	CAC	CAC	CAC	BRI	BRI	BRI	BRI	BRI	BRI	TPA	TPA	TPA	TPA	TPA	TPA	PCR	PCR	PCR	PCR	PCR	PCR	BTA	BTA	BTA	BTA	BTA	BTA	TAR
Transect	1	2	3	4	5	6	1	2	3	4	5	6	1	2	3	4	5	6	1	2	3	4	5	6	1	2	3	4	5	6	1	2	3	4	5	6	1	2	3	4	5	6	1	2	3	4	5	6	1
Region x Location	EastPDM	EastPDM	EastPDM	EastPDM	EastPDM	EastPDM	EastPFI	EastPFI	EastPFI	EastPFI	EastPFI	EastPFI	EastCDP	EastCDP	EastCDP	EastCDP	EastCDP	EastCDP	WestCAC	WestCAC	WestCAC	WestCAC	WestCAC	WestCAC	WestBRI	WestBRI	WestBRI	WestBRI	WestBRI	WestBRI	WestTPA	WestTPA	WestTPA	WestTPA	WestTPA	WestTPA	CulPCR	CulPCR	CulPCR	CulPCR	CulPCR	CulPCR	CulBTA	CulBTA	CulBTA	CulBTA	CulBTA	CulBTA	CulTAR
[truncated: 47 more columns]
