# Supplementary material
Source: MDPI journal article supplement (https://www.mdpi.com/1424-2818/14/10/804)
Supplement: s1 [file s1 › Hernandez - Table S2. Coral recruit density.xlsx]

## Sheet: Sheet1
Species	Code	PDM-1-1	PDM-1-2	PDM-1-3	PDM-1-4	PDM-1-5	PDM-2-1	PDM-2-2	PDM-2-3	PDM-2-4	PDM-2-5	PDM-3-1	PDM-3-2	PDM-3-3	PDM-3-4	PDM-3-5	PDM-4-1	PDM-4-2	PDM-4-3	PDM-4-4	PDM-4-5	PDM-5-1	PDM-5-2	PDM-5-3	PDM-5-4	PDM-5-5	PDM-6-1	PDM-6-2	PDM-6-3	PDM-6-4	PDM-6-5	PFI-1-1	PFI-1-2	PFI-1-3	PFI-1-4	PFI-1-5	PFI-2-1	PFI-2-2	PFI-2-3	PFI-2-4	PFI-2-5	PFI-3-1	PFI-3-2	PFI-3-3	PFI-3-4	PFI-3-5	PFI-4-1	PFI-4-2	PFI-4-3
Total coral recruits	Total Rec	0	0	0	0	0	0	0	0	0	0	0	1	0	1	0	0	1	0	1	0	0	0	0	1	0	1	0	0	0	0	1	2	4	4	3	0	0	5	0	0	9	4	7	4	0	0	0	0
Porites astreoides	Past	0	0	0	0	0	0	0	0	0	0	0	0	0	1	0	0	1	0	0	0	0	0	0	0	0	1	0	0	0	0	1	1	0	1	1	0	0	0	0	0	0	0	1	0	0	0	0	0
Siderastrea radians	Srad	0	0	0	0	0	0	0	0	0	0	0	1	0	0	0	0	0	0	1	0	0	0	0	1	0	0	0	0	0	0	0	1	0	3	2	0	0	2	0	0	9	3	5	2	0	0	0	0
Millepora complanata	Mcom	0	0	0	0	0	0	0	0	0	0	0	0	0	0	0	0	0	0	0	0	0	0	0	0	0	0	0	0	0	0	0	0	0	0	0	0	0	3	0	0	0	0	0	0	0	0	0	0
Agaricia humilis	Ahum	0	0	0	0	0	0	0	0	0	0	0	0	0	0	0	0	0	0	0	0	0	0	0	0	0	0	0	0	0	0	0	0	0	0	0	0	0	0	0	0	0	0	1	0	0	0	0	0
Siderastrea siderea	Ssid	0	0	0	0	0	0	0	0	0	0	0	0	0	0	0	0	0	0	0	0	0	0	0	0	0	0	0	0	0	0	0	0	0	0	0	0	0	0	0	0	0	0	0	1	0	0	0	0
Porites furcata	Pfur	0	0	0	0	0	0	0	0	0	0	0	0	0	0	0	0	0	0	0	0	0	0	0	0	0	0	0	0	0	0	0	0	0	0	0	0	0	0	0	0	0	0	0	0	0	0	0	0
Porites porites	Ppor	0	0	0	0	0	0	0	0	0	0	0	0	0	0	0	0	0	0	0	0	0	0	0	0	0	0	0	0	0	0	0	0	4	0	0	0	0	0	0	0	0	1	0	0	0	0	0	0
Pseudodiploria strigosa	Pstr	0	0	0	0	0	0	0	0	0	0	0	0	0	0	0	0	0	0	0	0	0	0	0	0	0	0	0	0	0	0	0	0	0	0	0	0	0	0	0	0	0	0	0	0	0	0	0	0
Millepora alcicornis	Malc	0	0	0	0	0	0	0	0	0	0	0	0	0	0	0	0	0	0	0	0	0	0	0	0	0	0	0	0	0	0	0	0	0	0	0	0	0	0	0	0	0	0	0	0	0	0	0	0
Diploria labyrinthiformis	Dlab	0	0	0	0	0	0	0	0	0	0	0	0	0	0	0	0	0	0	0	0	0	0	0	0	0	0	0	0	0	0	0	0	0	0	0	0	0	0	0	0	0	0	0	0	0	0	0	0
Erythropodium caribbaeorum	Ecar	0	0	0	0	0	0	0	0	0	0	0	0	0	0	0	0	0	0	0	0	0	0	0	0	0	0	0	0	0	0	0	0	0	0	0	0	0	0	0	0	0	0	0	1	0	0	0	0
Favia fragum	Ffra	0	0	0	0	0	0	0	0	0	0	0	0	0	0	0	0	0	0	0	0	0	0	0	0	0	0	0	0	0	0	0	0	0	0	0	0	0	0	0	0	0	0	0	0	0	0	0	0
Agaricia agaricites	Aaga	0	0	0	0	0	0	0	0	0	0	0	0	0	0	0	0	0	0	0	0	0	0	0	0	0	0	0	0	0	0	0	0	0	0	0	0	0	0	0	0	0	0	0	0	0	0	0	0
Pseudodiploria clivosa	Pcli	0	0	0	0	0	0	0	0	0	0	0	0	0	0	0	0	0	0	0	0	0	0	0	0	0	0	0	0	0	0	0	0	0	0	0	0	0	0	0	0	0	0	0	0	0	0	0	0
Acropora cervicornis	Acer	0	0	0	0	0	0	0	0	0	0	0	0	0	0	0	0	0	0	0	0	0	0	0	0	0	0	0	0	0	0	0	0	0	0	0	0	0	0	0	0	0	0	0	0	0	0	0	0
Orbicella faveolata	Ofav	0	0	0	0	0	0	0	0	0	0	0	0	0	0	0	0	0	0	0	0	0	0	0	0	0	0	0	0	0	0	0	0	0	0	0	0	0	0	0	0	0	0	0	0	0	0	0	0
Orbicella annularis	Oann	0	0	0	0	0	0	0	0	0	0	0	0	0	0	0	0	0	0	0	0	0	0	0	0	0	0	0	0	0	0	0	0	0	0	0	0	0	0	0	0	0	0	0	0	0	0	0	0
Eunicea sp.	Eun	0	0	0	0	0	0	0	0	0	0	0	0	0	0	0	0	0	0	0	0	0	0	0	0	0	0	0	0	0	0	0	0	0	0	0	0	0	0	0	0	0	0	0	0	0	0	0	0
Acropora prolifera	Apro	0	0	0	0	0	0	0	0	0	0	0	0	0	0	0	0	0	0	0	0	0	0	0	0	0	0	0	0	0	0	0	0	0	0	0	0	0	0	0	0	0	0	0	0	0	0	0	0
Acropora palmata	Apal	0	0	0	0	0	0	0	0	0	0	0	0	0	0	0	0	0	0	0	0	0	0	0	0	0	0	0	0	0	0	0	0	0	0	0	0	0	0	0	0	0	0	0	0	0	0	0	0
Muricea sp.	Mur	0	0	0	0	0	0	0	0	0	0	0	0	0	0	0	0	0	0	0	0	0	0	0	0	0	0	0	0	0	0	0	0	0	0	0	0	0	0	0	0	0	0	0	0	0	0	0	0
Meandrina meandrites	Mmea	0	0	0	0	0	0	0	0	0	0	0	0	0	0	0	0	0	0	0	0	0	0	0	0	0	0	0	0	0	0	0	0	0	0	0	0	0	0	0	0	0	0	0	0	0	0	0	0
Orbicella franksi	Ofra	0	0	0	0	0	0	0	0	0	0	0	0	0	0	0	0	0	0	0	0	0	0	0	0	0	0	0	0	0	0	0	0	0	0	0	0	0	0	0	0	0	0	0	0	0	0	0	0
Agaricia fragilis	Afra	0	0	0	0	0	0	0	0	0	0	0	0	0	0	0	0	0	0	0	0	0	0	0	0	0	0	0	0	0	0	0	0	0	0	0	0	0	0	0	0	0	0	0	0	0	0	0	0
Montastraea cavernosa	Mcav	0	0	0	0	0	0	0	0	0	0	0	0	0	0	0	0	0	0	0	0	0	0	0	0	0	0	0	0	0	0	0	0	0	0	0	0	0	0	0	0	0	0	0	0	0	0	0	0
Isophyllia sinuosa	Isin	0	0	0	0	0	0	0	0	0	0	0	0	0	0	0	0	0	0	0	0	0	0	0	0	0	0	0	0	0	0	0	0	0	0	0	0	0	0	0	0	0	0	0	0	0	0	0	0
Plexaurella sp.	Plexrla	0	0	0	0	0	0	0	0	0	0	0	0	0	0	0	0	0	0	0	0	0	0	0	0	0	0	0	0	0	0	0	0	0	0	0	0	0	0	0	0	0	0	0	0	0	0	0	0
	Region	East	East	East	East	East	East	East	East	East	East	East	East	East	East	East	East	East	East	East	East	East	East	East	East	East	East	East	East	East	East	East	East	East	East	East	East	East	East	East	East	East	East	East	East	East	East	East	East
	Location	PDM	PDM	PDM	PDM	PDM	PDM	PDM	PDM	PDM	PDM	PDM	PDM	PDM	PDM	PDM	PDM	PDM	PDM	PDM	PDM	PDM	PDM	PDM	PDM	PDM	PDM	PDM	PDM	PDM	PDM	PFI	PFI	PFI	PFI	PFI	PFI	PFI	PFI	PFI	PFI	PFI	PFI	PFI	PFI	PFI	PFI	PFI	PFI
	Transect	1	1	1	1	1	2	2	2	2	2	3	3	3	3	3	4	4	4	4	4	5	5	5	5	5	6	6	6	6	6	1	1	1	1	1	2	2	2	2	2	3	3	3	3	3	4	4	4
	Quadrat	1	2	3	4	5	1	2	3	4	5	1	2	3	4	5	1	2	3	4	5	1	2	3	4	5	1	2	3	4	5	1	2	3	4	5	1	2	3	4	5	1	2	3	4	5	1	2	3
	Region x Location	EastPDM	EastPDM	EastPDM	EastPDM	EastPDM	EastPDM	EastPDM	EastPDM	EastPDM	EastPDM	EastPDM	EastPDM	EastPDM	EastPDM	EastPDM	EastPDM	EastPDM	EastPDM	EastPDM	EastPDM	EastPDM	EastPDM	EastPDM	EastPDM	EastPDM	EastPDM	EastPDM	EastPDM	EastPDM	EastPDM	EastPFI	EastPFI	EastPFI	EastPFI	EastPFI	EastPFI	EastPFI	EastPFI	EastPFI	EastPFI	EastPFI	EastPFI	EastPFI	EastPFI	EastPFI	EastPFI	EastPFI	EastPFI
[truncated: 440 more columns]
