# Supplementary material
Source: MDPI journal article supplement (https://www.mdpi.com/1424-2818/14/10/804)
Supplement: s1 [file s1 › Hernandez - Table S3 Water quality.xlsx]

## Sheet: Sheet1
Water quality parameters	PDM-1	PDM-2	PDM-3	PFI-1	PFI-2	PFI-3	CDP-1	CDP-2	CDP-3	CAC-1	CAC-2	CAC-3	BRI-1	BRI-2	BRI-3	TPA-1	TPA-2	TPA-3	PCR-1	PCR-2	PCR-3	BTA-1	BTA-2	BTA-3	TAR-1	TAR-2	TAR-3	PME-1	PME-2	PME-3	BSA-1	BSA-2	BSA-3	TAM-1	TAM-2	TAM-3	DAT-1	DAT-2	DAT-3	PCA-1	PCA-2	PCA-3	DAK-1	DAK-2	DAK-3	PVA-1	PVA-2	PVA-3
Dissolved oxygen (mg/L)	3.86	2.89	4.16	2.4	2.6	2.3	7.7	8.1	7.8	4.32	4.67	4.53	6.05	6.16	5.85	5.02	4.94	5.26	8.6	8.4	9.2	6.6	6.2	5.8	5.1	5.2	5.6	4.7	5.3	2.3	2.1	2.3	0.9	5.5	5.3	4.9	7.3	9.7	6.4	10.4	7	6.4	8.7	7.8	8.6	5.6	6.5	6.2
Turbidity (NTU)	2.66	2.49	2.42	3.38	3.53	3.77	0.57	0.66	0.73	1.88	2.32	2.04	1.12	1.06	1.25	2.02	1.9	2.16	0.2	0.18	0.23	1.66	1.72	1.25	1.12	0.96	0.94	0.08	0.52	0.33	1.72	0.52	0.64	0.7	0.49	0.55	0.27	0.81	0.33	1.42	0.81	0.57	1.39	1.26	1.07	1.77	1.48	1.66
Chl-a (μg/L)	2.147	2.113	2.184	2.394	2.582	2.425	1.019	1.382	1.513	0.618	0.865	0.498	0.482	0.673	0.711	2.121	1.876	1.464	1.104	1.076	1.095	1.182	1.068	1.124	1.517	1.622	1.423	1.601	1.029	1.477	1.589	1.001	1.092	1.3	1.403	1.79	1.064	1.124	1.646	1.421	1.275	1.584	1.489	1.216	1.544	1.623	1.428	1.388
OABs (ppm)	60.74	47.36	52.85	79.12	106.3	59.66	14.57	9.862	11.06	131.78	86.23	76.82	14.9	21.75	19.86	46.78	53.02	32.45	6.53	8.55	7.76	15.57	12.14	9.476	11.2	8.662	7.136	19.18	11.93	20.89	16.43	13.57	10.98	20.46	25.16	8.24	14.18	4.179	9.786	19.26	26.84	22.9	21.16	13.27	8.92	14.8	10.6	6.77
PO4 (μM)	2.76596	4.04255	3.40426	3.61702	2.97872	3.40426	0.425532	0.212766	0.851064	1.70213	2.34043	1.2766	1.06383	1.48936	1.70213	0.638298	1.70213	1.48936	1.2766	1.06383	1.2766	0.212766	0.638298	1.2766	0.425532	1.2766	1.2766	0.212766	2.34043	0.851064	0.851064	2.55319	1.06383	0.851064	1.2766	1.48936	2.55319	0.638298	2.55319	1.48936	0.212766	1.48936	1.91489	2.34043	1.2766	2.34043	0.851064	1.2766
NH3 (μM)	127.2	130.8	108	135.6	189.6	243.6	14.4	20.4	15.6	140.4	171.6	135.6	104.4	110.4	75.6	76.8	57.6	62.4	8.4	13.2	6	4.8	13.2	6	9.6	8.4	15.6	19.2	10.8	21.6	174	318	386.4	60	19.2	13.2	15.6	19.2	15.6	6	24	21.6	8.4	19.2	16.8	9.6	13.2	12
NH4+ (μM)	125.273	128.818	106.364	133.545	186.727	239.909	14.1818	20.0909	15.3636	138.273	169	133.545	102.818	108.727	74.4545	75.6364	56.7273	61.4545	8.27273	13	5.90909	4.72727	13	5.90909	9.45455	8.27273	15.3636	18.9091	10.6364	21.2727	171.364	313.182	380.545	59.0909	18.9091	13	15.3636	18.9091	15.3636	5.90909	23.6364	21.2727	8.27273	18.9091	16.5455	9.45455	13	11.8182
NO3 (μM)	18.4516	11.3548	22.7097	21.2903	15.6129	17.0323	8.51613	5.67742	4.25806	24.129	15.6129	14.1935	15.6129	12.7742	17.0323	11.3548	19.871	15.6129	32.6452	24.129	41.1613	11.3548	11.3548	14.1935	22.7097	17.0323	7.09677	29.8065	14.1935	9.93548	14.1935	7.09677	31.2258	25.5484	32.6452	24.129	32.6452	24.129	41.1613	12.7742	26.9677	11.3548	15.6129	22.7097	14.1935	17.0323	11.3548	17.0323
NO2 (μM)	10.4739	6.16957	5.02174	16.5	13.3435	12.0522	3.01304	7.46087	5.3087	12.7696	11.7652	16.0696	16.787	14.7783	13.9174	9.61304	11.7652	12.3391	4.30435	2.72609	6.45652	8.89565	9.46957	7.46087	4.5913	7.31739	5.16522	8.89565	10.6174	9.03913	20.6609	14.3478	16.9304	9.32609	5.88261	5.73913	4.30435	2.72609	6.45652	12.6261	1.86522	10.4739	15.2087	11.9087	9.32609	11.1913	7.8913	6.6
Total N (μM)	156.126	148.324	135.731	173.39	218.556	272.684	25.9292	33.5383	25.1668	177.299	198.978	165.863	136.8	137.952	106.55	97.7679	89.2362	90.352	45.3495	40.0551	53.6178	25.0505	34.0244	27.6544	36.901	32.7496	27.862	57.9021	35.6109	40.5746	208.854	339.445	434.556	94.8745	57.7278	43.0682	52.5495	46.0551	63.2178	31.4003	52.833	43.4288	39.2216	53.8184	40.3196	37.8236	32.4461	35.6323
Region	East	East	East	East	East	East	East	East	East	West	West	West	West	West	West	West	West	West	Cul	Cul	Cul	Cul	Cul	Cul	Cul	Cul	Cul	Cul	Cul	Cul	Cul	Cul	Cul	Cul	Cul	Cul	Cul	Cul	Cul	Cul	Cul	Cul	Cul	Cul	Cul	Cul	Cul	Cul
Location	PDM	PDM	PDM	PFI	PFI	PFI	CDP	CDP	CDP	CAC	CAC	CAC	BRI	BRI	BRI	TPA	TPA	TPA	PCR	PCR	PCR	BTA	BTA	BTA	TAR	TAR	TAR	PME	PME	PME	BSA	BSA	BSA	TAM	TAM	TAM	DAT	DAT	DAT	PCA	PCA	PCA	DAK	DAK	DAK	PVA	PVA	PVA
Replicate	1	2	3	1	2	3	1	2	3	1	2	3	1	2	3	1	2	3	1	2	3	1	2	3	1	2	3	1	2	3	1	2	3	1	2	3	1	2	3	1	2	3	1	2	3	1	2	3
Region x Location	EastPDM	EastPDM	EastPDM	EastPFI	EastPFI	EastPFI	EastCDP	EastCDP	EastCDP	WestCAC	WestCAC	WestCAC	WestBRI	WestBRI	WestBRI	WestTPA	WestTPA	WestTPA	CulPCR	CulPCR	CulPCR	CulBTA	CulBTA	CulBTA	CulTAR	CulTAR	CulTAR	CulPME	CulPME	CulPME	CulBSA	CulBSA	CulBSA	CulTAM	CulTAM	CulTAM	CulDAT	CulDAT	CulDAT	CulPCA	CulPCA	CulPCA	CulDAK	CulDAK	CulDAK	CulPVA	CulPVA	CulPVA
