# Supplementary material
Source: MDPI journal article supplement (https://www.mdpi.com/1424-2818/14/10/804)
Supplement: s1 [file s1 › Supp 4 - Remotely sensed WQ data.pdf]

## Supplementary Material – 4

The shade plot does not show a regional pattern in coral recruit species richness variability among regions, but show high variability among locations within each region in coral recruit species richness (Figure S1). Of all the locations, CDP off the eastern coast showed the highest richness (17 species), followed by BTA (15 species) and PME (14 species) in Culebra, and TPA in the western coast (12 species). No coral recruits were documented on the two hurricane-impacted shallow reefs at TAR and DAK in Culebra, which showed extensive framework pulverization, with unstable substrates that can freely move and overturn with wave action (Figure S1).

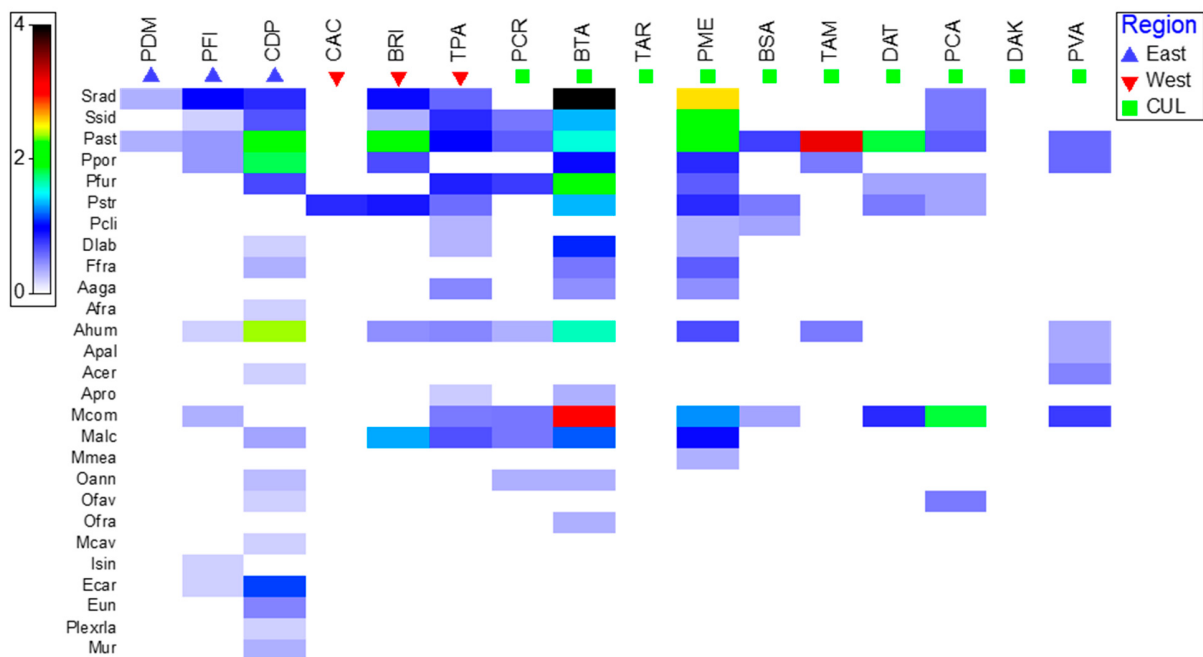

**Figure S1.** A) Shade plot based on the  $\sqrt{\text{density}}$  (#/m<sup>2</sup>) of coral recruits by species x region x location; B) PCO analysis based on the  $\sqrt{\text{density}}$  (#/m<sup>2</sup>) of coral recruits x region x location. This solution explains 61.7% of the observed spatial variation. Refer to the Methodology for the description of acronyms.

A bubble plot based on nMDS analysis produced four clusters that go from lowest to highest total coral recruit density (Figure S2). A first cluster was composed by DAK, TAR and PDM, with the first two locations being hurricane-impacted locations in Culebra Island, and PDM showing chronic water quality degradation in the eastern coast. This cluster showed the lowest coral recruit density. The second cluster consisted of locations with moderate to low recruit density at CAC, BSA, PFI, PVA and PCR, which represent a mixture of locations affected by hurricane impacts (PVA, PCR) in Culebra, and recurrent degraded water quality pulses (CAC, PFI, BSA). The third cluster was composed of locations with moderately high recruit density, including TAM, PCA, and DAT in Culebra, and BRI and TPA in the west coast. The fourth cluster consisted of BTA and PME in Culebra, and of CDP, off the eastern coast, and represent locations with the highest coral recruit densities. A total of 27 species of coral recruits were documented.

A bubble plot based on n-MDS analysis similarly showed four clustering patterns based on a gradient of species richness (Figure S3). The first cluster was composed of hurricane-impacted DAK and TAM in Culebra. The second cluster was composed of moderate to low species richness, and included CAC, PDM,

PFI, DAT, PCA, BSA, DAK, PCR, and PVA. The third cluster consisted of locations with moderate to high species richness and included BRI and TPA. Locations with the highest species richness dominated the final cluster, including PME, BTA, and CDP.

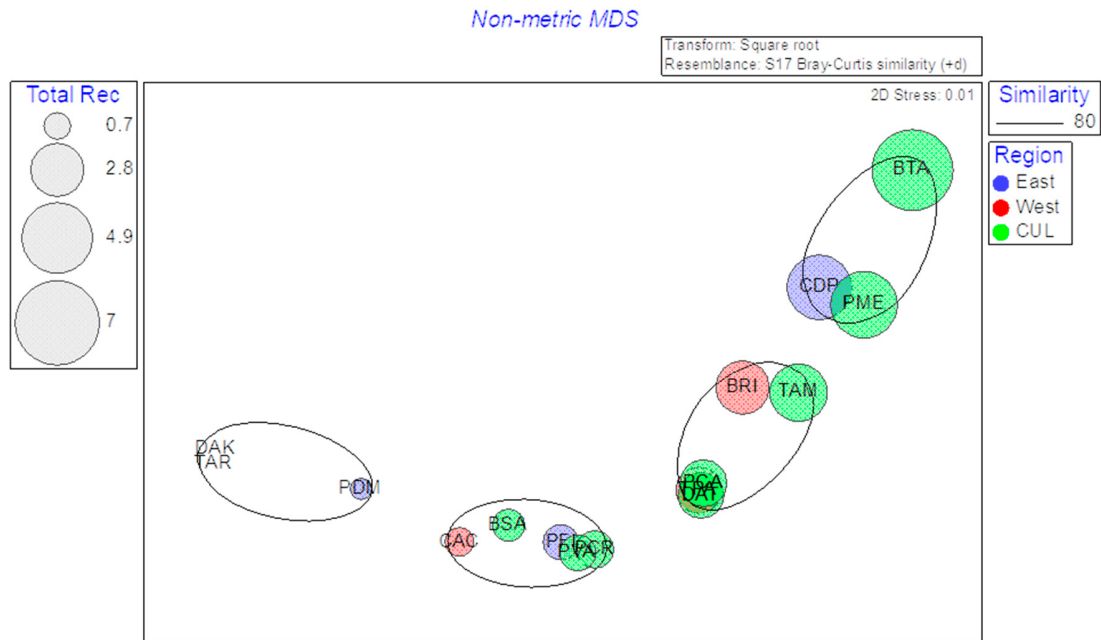

**Figure S2.** Bubble plot based on a non-metric multidimensional scaling analysis (nMDS) on the  $\sqrt{\text{density}}$  ( $\#/m^2$ ) of all coral recruits by region and by sampling location. Refer to the Methodology for the description of acronyms. Stress level= 0.01.

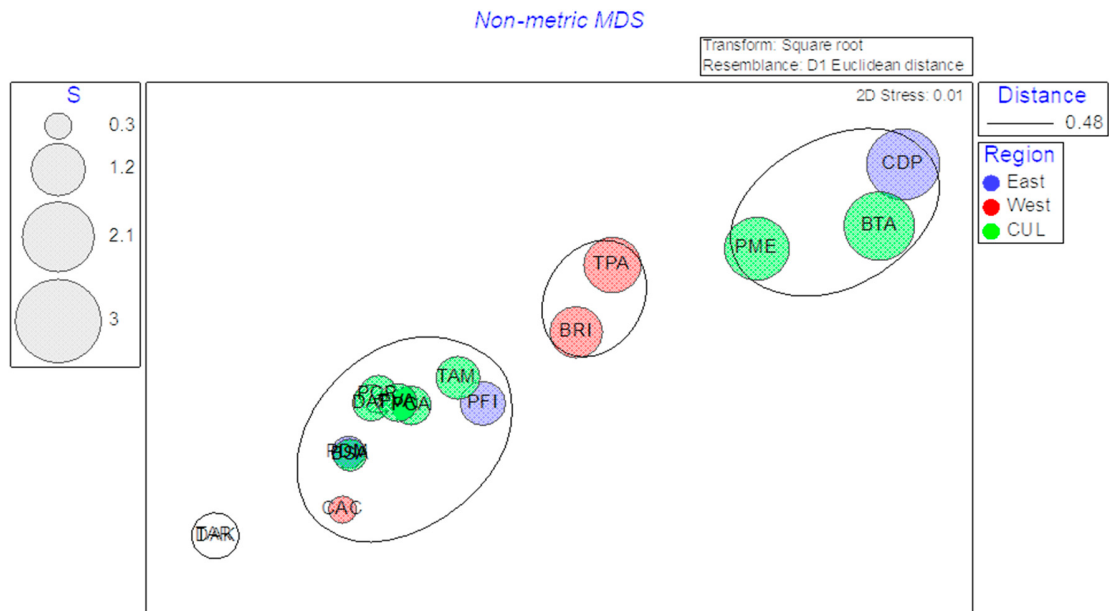

**Figure S3.** Bubble plot based on a non-metric multidimensional scale analysis (nMDS) on the species richness (S) of all recruits by region and by locality. Refer to the Methodology for the description of acronyms.

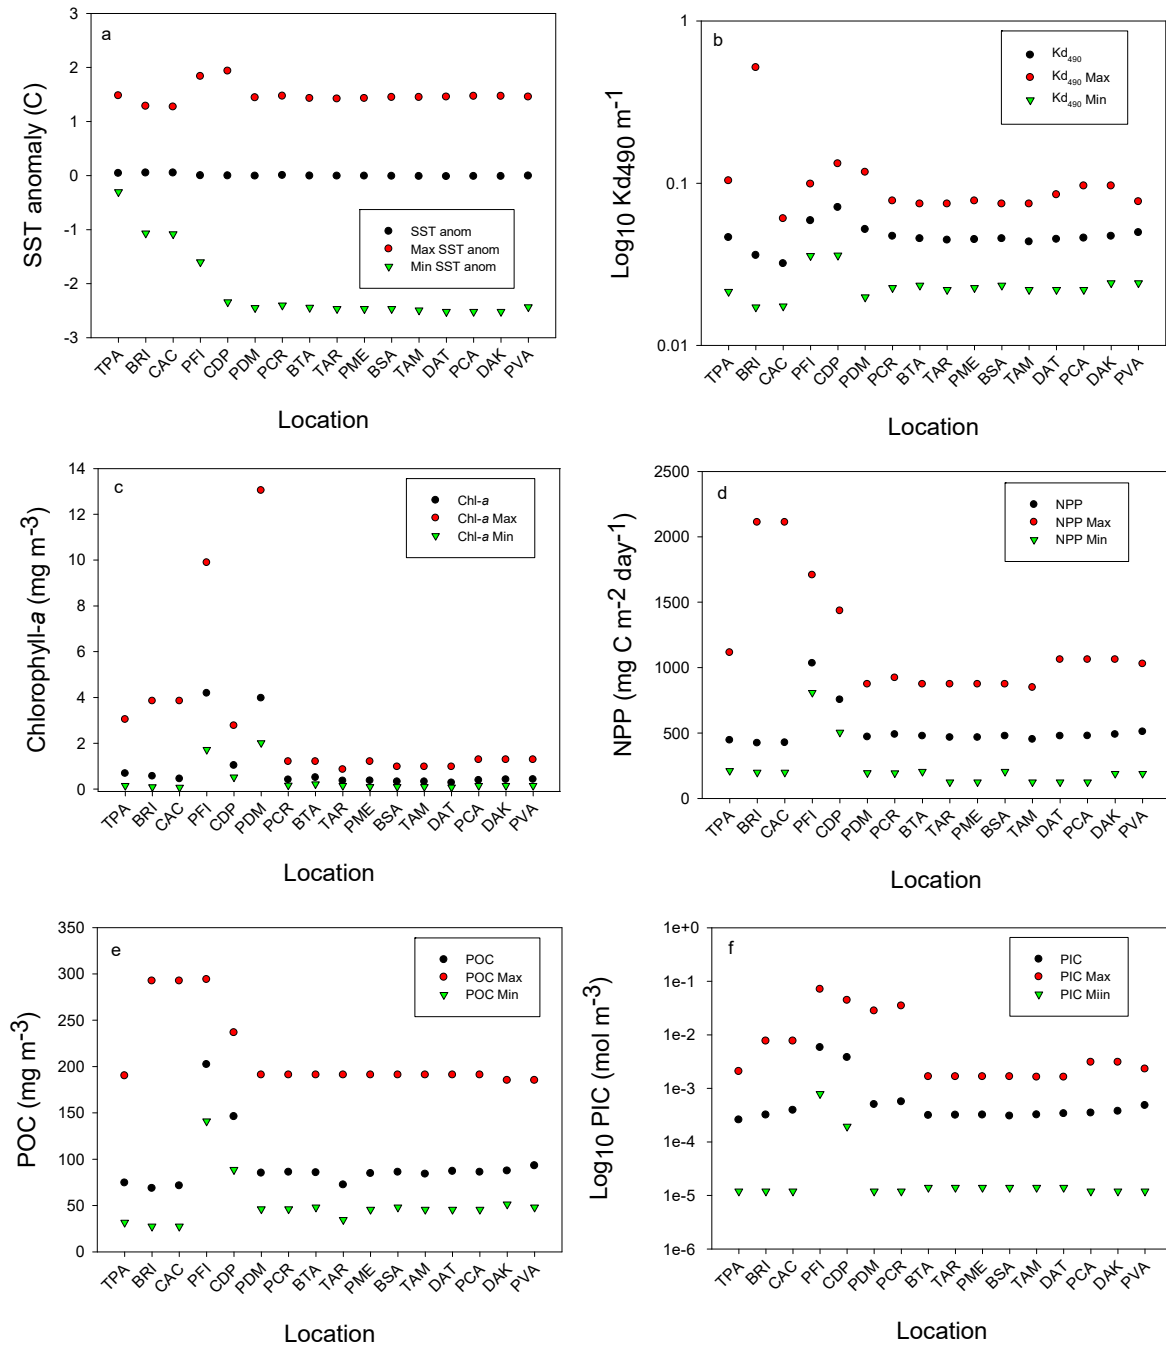

**Figure S4.** Running mean, maximum and minimum values of remotely sensed water quality parameters (2017-2020) across study locations: a) Sea surface temperature anomaly (°C); b) Light extinction coefficient Log<sub>10</sub> K<sub>d490</sub> m<sup>-1</sup>; c) Chlorophyll-a concentration (mg m<sup>-3</sup>); d) Net primary productivity (mg C m<sup>-2</sup> day<sup>-1</sup>); e) Particulate organic carbon concentration (mg m<sup>-3</sup>); and f) Particulate organic carbon concentration (Log<sub>10</sub> mol m<sup>-3</sup>).

**Table S4.** Annual values of remotely sensed water quality parameters (2017-2020) across study locations.

| Parameter*              | TPA                 | BRI                 | CAC                 | PFI                 | CDP                 | PDM                 | PCR                 | BTA                 | TAR                 | PME                 | BSA                 | TAM                 | DAT                 | PCA                 | DAK                 | PVA                 |
|-------------------------|---------------------|---------------------|---------------------|---------------------|---------------------|---------------------|---------------------|---------------------|---------------------|---------------------|---------------------|---------------------|---------------------|---------------------|---------------------|---------------------|
| SST Anom Ave            | 0.039               | 0.048               | 0.047               | -0.003              | -0.006              | -0.012              | 0.001               | -0.008              | -0.012              | -0.012              | -0.013              | -0.017              | -0.019              | -0.018              | -0.017              | -0.010              |
| SST Anom Var            | 0.161               | 0.159               | 0.159               | 0.292               | 0.291               | 0.211               | 0.207               | 0.209               | 0.210               | 0.210               | 0.210               | 0.212               | 0.213               | 0.211               | 0.211               | 0.208               |
| SST Anom Max            | 1.476               | 1.281               | 1.268               | 1.833               | 1.931               | 1.438               | 1.467               | 1.425               | 1.418               | 1.425               | 1.443               | 1.444               | 1.451               | 1.465               | 1.465               | 1.452               |
| SST Anom Min            | -0.305              | -1.068              | -1.084              | -1.602              | -2.342              | -2.449              | -2.4                | -2.443              | -2.464              | -2.467              | -2.464              | -2.492              | -2.521              | -2.519              | -2.519              | -2.434              |
| SST Anom Range          | 1.781               | 2.349               | 2.352               | 3.435               | 4.273               | 3.887               | 3.867               | 3.868               | 3.882               | 3.892               | 3.907               | 3.936               | 3.972               | 3.984               | 3.984               | 3.886               |
| Kd <sub>490</sub> Ave   | 0.0462              | 0.0358              | 0.0319              | 0.0587              | 0.0708              | 0.0518              | 0.0470              | 0.0454              | 0.0445              | 0.0449              | 0.0454              | 0.0434              | 0.0450              | 0.0458              | 0.0470              | 0.0495              |
| Kd <sub>490</sub> Var   | 0.0003              | 0.0008              | 0.0005              | 0.0001              | 0.0002              | 0.0003              | 0.0001              | 0.0001              | 0.0001              | 0.0001              | 0.0001              | 0.0001              | 0.0002              | 0.0001              | 0.0001              | 0.0001              |
| Kd <sub>490</sub> Max   | 0.1034              | 0.5162              | 0.0604              | 0.0986              | 0.1318              | 0.1166              | 0.0776              | 0.0744              | 0.0744              | 0.0776              | 0.0744              | 0.0744              | 0.0848              | 0.096               | 0.096               | 0.0768              |
| Kd <sub>490</sub> Min   | 0.0214              | 0.0172              | 0.0174              | 0.0356              | 0.0358              | 0.0198              | 0.0226              | 0.0234              | 0.022               | 0.0226              | 0.0234              | 0.022               | 0.022               | 0.022               | 0.0242              | 0.0242              |
| Kd <sub>490</sub> Range | 0.082               | 0.499               | 0.043               | 0.063               | 0.096               | 0.0968              | 0.055               | 0.051               | 0.0524              | 0.055               | 0.051               | 0.0524              | 0.0628              | 0.074               | 0.0718              | 0.0526              |
| Chl Ave                 | 0.6748              | 0.5562              | 0.4441              | 4.1858              | 1.0275              | 3.9669              | 0.4056              | 0.5033              | 0.3565              | 0.3607              | 0.3191              | 0.3204              | 0.2758              | 0.3840              | 0.4138              | 0.4178              |
| Chl Var                 | 0.3170              | 0.3968              | 0.2493              | 2.9895              | 0.1213              | 6.1893              | 0.0233              | 0.0260              | 0.0118              | 0.0213              | 0.0137              | 0.0126              | 0.0102              | 0.0188              | 0.0248              | 0.0253              |
| Chl Max                 | 3.0389              | 3.8454              | 3.8454              | 9.8863              | 2.7662              | 13.0370             | 1.2010              | 1.2010              | 0.8552              | 1.2010              | 0.9759              | 0.9758              | 0.9759              | 1.2787              | 1.2787              | 1.2787              |
| Chl Min                 | 0.1477              | 0.0918              | 0.0723              | 1.7210              | 0.5174              | 2.0199              | 0.1656              | 0.2147              | 0.1473              | 0.1044              | 0.1044              | 0.1044              | 0.0768              | 0.1473              | 0.1485              | 0.1485              |
| Chl Range               | 2.8912              | 3.7536              | 3.7731              | 8.1653              | 2.2488              | 11.0171             | 1.0353              | 0.9863              | 0.7079              | 1.0966              | 0.8715              | 0.8715              | 0.8991              | 1.1314              | 1.1301              | 1.1301              |
| NPP Ave                 | 444.1               | 422.5               | 425.6               | 1033.2              | 754.4               | 470.4               | 488.7               | 476.9               | 465.0               | 465.5               | 477.1               | 450.9               | 477.0               | 477.4               | 488.3               | 509.2               |
| NPP Var                 | 33869               | 71145               | 72508               | 41059               | 20433               | 12444               | 13042               | 3174                | 14874               | 14927               | 13215               | 16543               | 16063               | 16115               | 16964               | 18213               |
| NPP Max                 | 1115                | 2111                | 2111                | 1707                | 1433                | 873                 | 921                 | 873                 | 873                 | 873                 | 873                 | 848                 | 1062                | 1062                | 1062                | 1029                |
| NPP Min                 | 212                 | 199                 | 199                 | 809                 | 505                 | 195                 | 195                 | 206                 | 125                 | 125                 | 206                 | 125                 | 125                 | 125                 | 190                 | 190                 |
| NPP Range               | 903                 | 1912                | 1912                | 897                 | 928                 | 678                 | 726                 | 667                 | 748                 | 748                 | 667                 | 723                 | 937                 | 937                 | 872                 | 838                 |
| POC Ave                 | 74.4                | 68.5                | 71.3                | 202.1               | 146.0               | 85.0                | 85.9                | 85.5                | 72.3                | 84.5                | 86.0                | 83.8                | 86.9                | 86.0                | 87.4                | 92.9                |
| POC Var                 | 1267                | 2150                | 2355                | 2481                | 980                 | 563                 | 547                 | 616                 | 466                 | 566                 | 655                 | 553                 | 552                 | 532                 | 499                 | 527                 |
| POC Max                 | 190                 | 292                 | 292                 | 294                 | 237                 | 191                 | 191                 | 191                 | 191                 | 191                 | 191                 | 191                 | 191                 | 191                 | 185                 | 185                 |
| POC Min                 | 32                  | 27                  | 27                  | 141                 | 89                  | 46                  | 46                  | 48                  | 35                  | 46                  | 48                  | 46                  | 46                  | 46                  | 51                  | 48                  |
| POC Range               | 158                 | 265                 | 265                 | 153                 | 148                 | 145                 | 145                 | 143                 | 156                 | 145                 | 143                 | 145                 | 145                 | 145                 | 134                 | 137                 |
| PIC Ave                 | 0.0002              | 0.0003              | 0.0004              | 0.0058              | 0.0038              | 0.0005              | 0.0005              | 0.0003              | 0.0003              | 0.0003              | 0.0003              | 0.0003              | 0.0003              | 0.0003              | 0.0004              | 0.0005              |
| PIC Var                 | 1.29 <sup>^-7</sup> | 1.14 <sup>^-6</sup> | 1.51 <sup>^-6</sup> | 1.53 <sup>^-4</sup> | 4.46 <sup>^-5</sup> | 3.61 <sup>^-6</sup> | 5.51 <sup>^-6</sup> | 8.68 <sup>^-8</sup> | 7.44 <sup>^-8</sup> | 7.86 <sup>^-8</sup> | 8.53 <sup>^-8</sup> | 6.15 <sup>^-8</sup> | 6.48 <sup>^-8</sup> | 9.21 <sup>^-8</sup> | 1.07 <sup>^-7</sup> | 1.38 <sup>^-7</sup> |
| PIC Max                 | 0.0021              | 0.0077              | 0.0077              | 0.0706              | 0.0440              | 0.0279              | 0.0345              | 0.0016              | 0.0016              | 0.0016              | 0.0016              | 0.0016              | 0.0016              | 0.0031              | 0.0031              | 0.0023              |
| PIC Min                 | 1.20 <sup>^-5</sup> | 1.20 <sup>^-5</sup> | 1.20 <sup>^-5</sup> | 7.92 <sup>^-4</sup> | 1.94 <sup>^-4</sup> | 1.20 <sup>^-5</sup> | 1.20 <sup>^-5</sup> | 1.40 <sup>^-5</sup> | 1.20 <sup>^-5</sup> | 1.20 <sup>^-5</sup> | 1.20 <sup>^-5</sup> |
| PIC Range               | 0.0021              | 0.0076              | 0.0076              | 0.0698              | 0.0438              | 0.0279              | 0.0345              | 0.0016              | 0.0016              | 0.0016              | 0.0016              | 0.0016              | 0.0016              | 0.0031              | 0.0031              | 0.0023              |

\* SST Anomaly= Sea surface temperature anomaly (°C); Kd<sub>490</sub>= Light attenuation coefficient (Kd<sub>490</sub>/m); Chl= Chlorophyll-*a* concentration (mg/m<sup>3</sup>); NPP= Net primary productivity (mg C/m<sup>2</sup>/d); POC= Particulate organic carbon concentration (mg/m<sup>3</sup>); PIC= Particulate inorganic carbon concentration (mol/m<sup>3</sup>). Ave= Average; Var= Variance; Max= Maximum; Min= Minimum

**Table S5.** Distance-based linear model analysis (DISTLM) of the impact of the normalized maximum annual values of remotely sensed water quality parameters (2017-2020) on coral recruit abundance.

| Marginal tests    | SS(trace) | Pseudo-F | <i>p</i> | Proportion |
|-------------------|-----------|----------|----------|------------|
| SST anomaly       | 216.9     | 0.22     | 0.8012   | 0.0178     |
| Kd <sub>490</sub> | 447.1     | 0.46     | 0.6166   | 0.0366     |
| Chl- <i>a</i>     | 3235.2    | 4.32     | 0.0359   | 0.2649     |
| NPP               | 247.3     | 0.25     | 0.7872   | 0.0202     |
| POC               | 237.2     | 0.24     | 0.8069   | 0.0194     |
| PIC               | 572.3     | 0.59     | 0.5249   | 0.0469     |

<sup>1</sup> Residual df= 12.

| Sequential tests   | R <sup>2</sup> | SS(trace) | Pseudo<br>-F | <i>p</i> | Prop.  | Cumul. | Res. df |
|--------------------|----------------|-----------|--------------|----------|--------|--------|---------|
| +SST anomaly       | 0.01776        | 216.9     | 0.22         | 0.8031   | 0.0178 | 0.0178 | 12      |
| +Kd <sub>490</sub> | 0.06716        | 603.5     | 0.58         | 0.5271   | 0.0494 | 0.0672 | 11      |
| +Chl- <i>a</i>     | 0.44001        | 4554.2    | 6.66         | 0.0083   | 0.3729 | 0.4400 | 10      |
| +NPP               | 0.48856        | 593.0     | 0.85         | 0.3829   | 0.0485 | 0.4886 | 9       |
| +POC               | 0.51342        | 303.7     | 0.41         | 0.6367   | 0.0249 | 0.5134 | 8       |
| +PIC               | 0.59525        | 999.5     | 1.42         | 0.2561   | 0.0818 | 0.5953 | 7       |

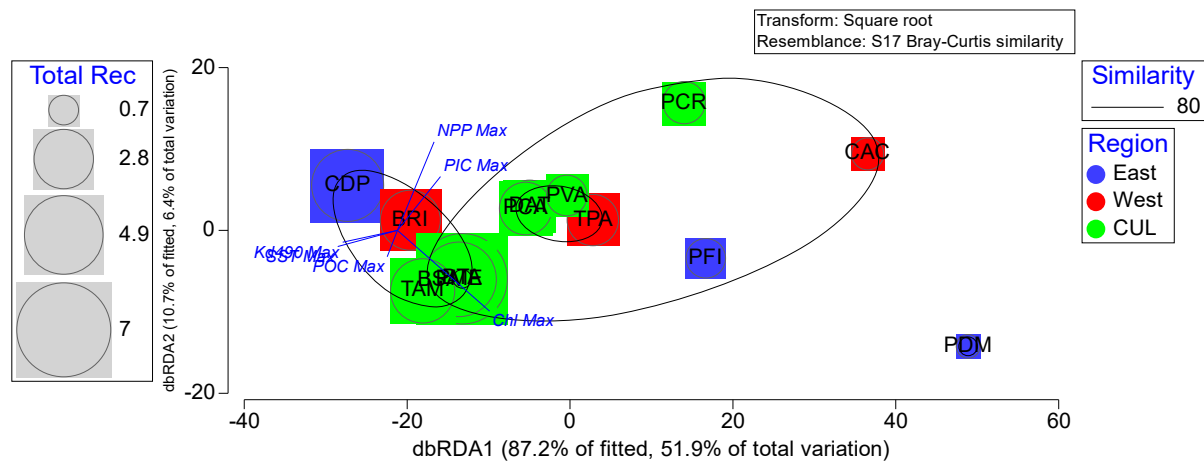

**Figure S5.** Distance-based redundant analysis (dbRDA) of the impact of the normalized maximum annual values of remotely sensed water quality parameters (2017-2020) on coral recruit abundance by region and location. This solution explains 97.96% of the observed fitted variation and 58.31% of the total variation. Refer to the Methodology for the description of acronyms.
